# Supplementary material
Source: PubMed Central journal article supplement (PMC5900775)

## Supplemental Figure Legends

**Fig. S1. Identification of RanBP5 as interacting protein via mass spectrometry, and Stx3 constructs. (A)** Table showing RanBP5 tryptic-digested peptides co-immunoprecipitated with Stx3. Peptides identified by LC-MS/MS.

**Fig. S2. Confirmation of binding to candidate co-activator proteins.** GST-Stx3S and Gal4 or Gal4-candidate protein were co-expressed in HEK293T cells and lysates subjected to precipitation via glutathione-coated sepharose. Lysates and bead precipitates were subjected to SDS-PAGE and immunoblotted for Gal4 or GST.

**Fig. S3. Candidate shRNA oligonucleotides. (A)** Alignment of the exon 9 - exon 11 junction with candidate shRNA oligonucleotides. Each oligonucleotide is 21bp long and predicted to silence Stx3S specifically. **(B)** Immunoprecipitation and immunoblot of HEK293T cells transduced with lentivirus delivering candidate shRNA oligo as indicated.

**Fig. S4. Cleaved Caspase-3 staining. (A)** Representative immunocytochemistry images of 5-day cultures of SCR or Stx3S KD Caco2 cells stained for cleaved Caspase-3 (green) and DAPI (blue). Scale bar 20 $\mu$ m. **(B)** Cleaved Caspase-3 quantification positive proportion for SCR and Stx3S KD cells. Bars represent the means and SEM of quadruplicate samples.

| <b>Sequence position</b> | <b>m/z</b> | <b>Peptide sequence</b> |
|--------------------------|------------|-------------------------|
| 45-53                    | 538.61     | ITFLLQAIR               |
| 63-70                    | 459.75     | QMAAVLLR                |
| 111-121                  | 630.81     | KICDIAELAR              |
| 112-121                  | 567.08     | ICDIAELAR               |
| 242-252                  | 587.25     | SLVEIADTVPK             |
| 420-439                  | 722.32     | YAACNAVGMQTDFFPGFQK     |
| 445-460                  | 902.35     | VIALLOTMEDQGNQR         |
| 500-506                  | 436.65     | LQELIQK                 |
| 560-573                  | 737.95     | TIECISLIGLAVGK          |
| 682-693                  | 717.07     | STACQMLVCYAK            |
| 697-708                  | 715.34     | EGFVEYTEQVVK            |
| 759-778                  | 716.96     | AIGTEPDSVDLSEIMHSFAK    |
| 965-985                  | 612.92     | TKENVNATENCISAVGK       |

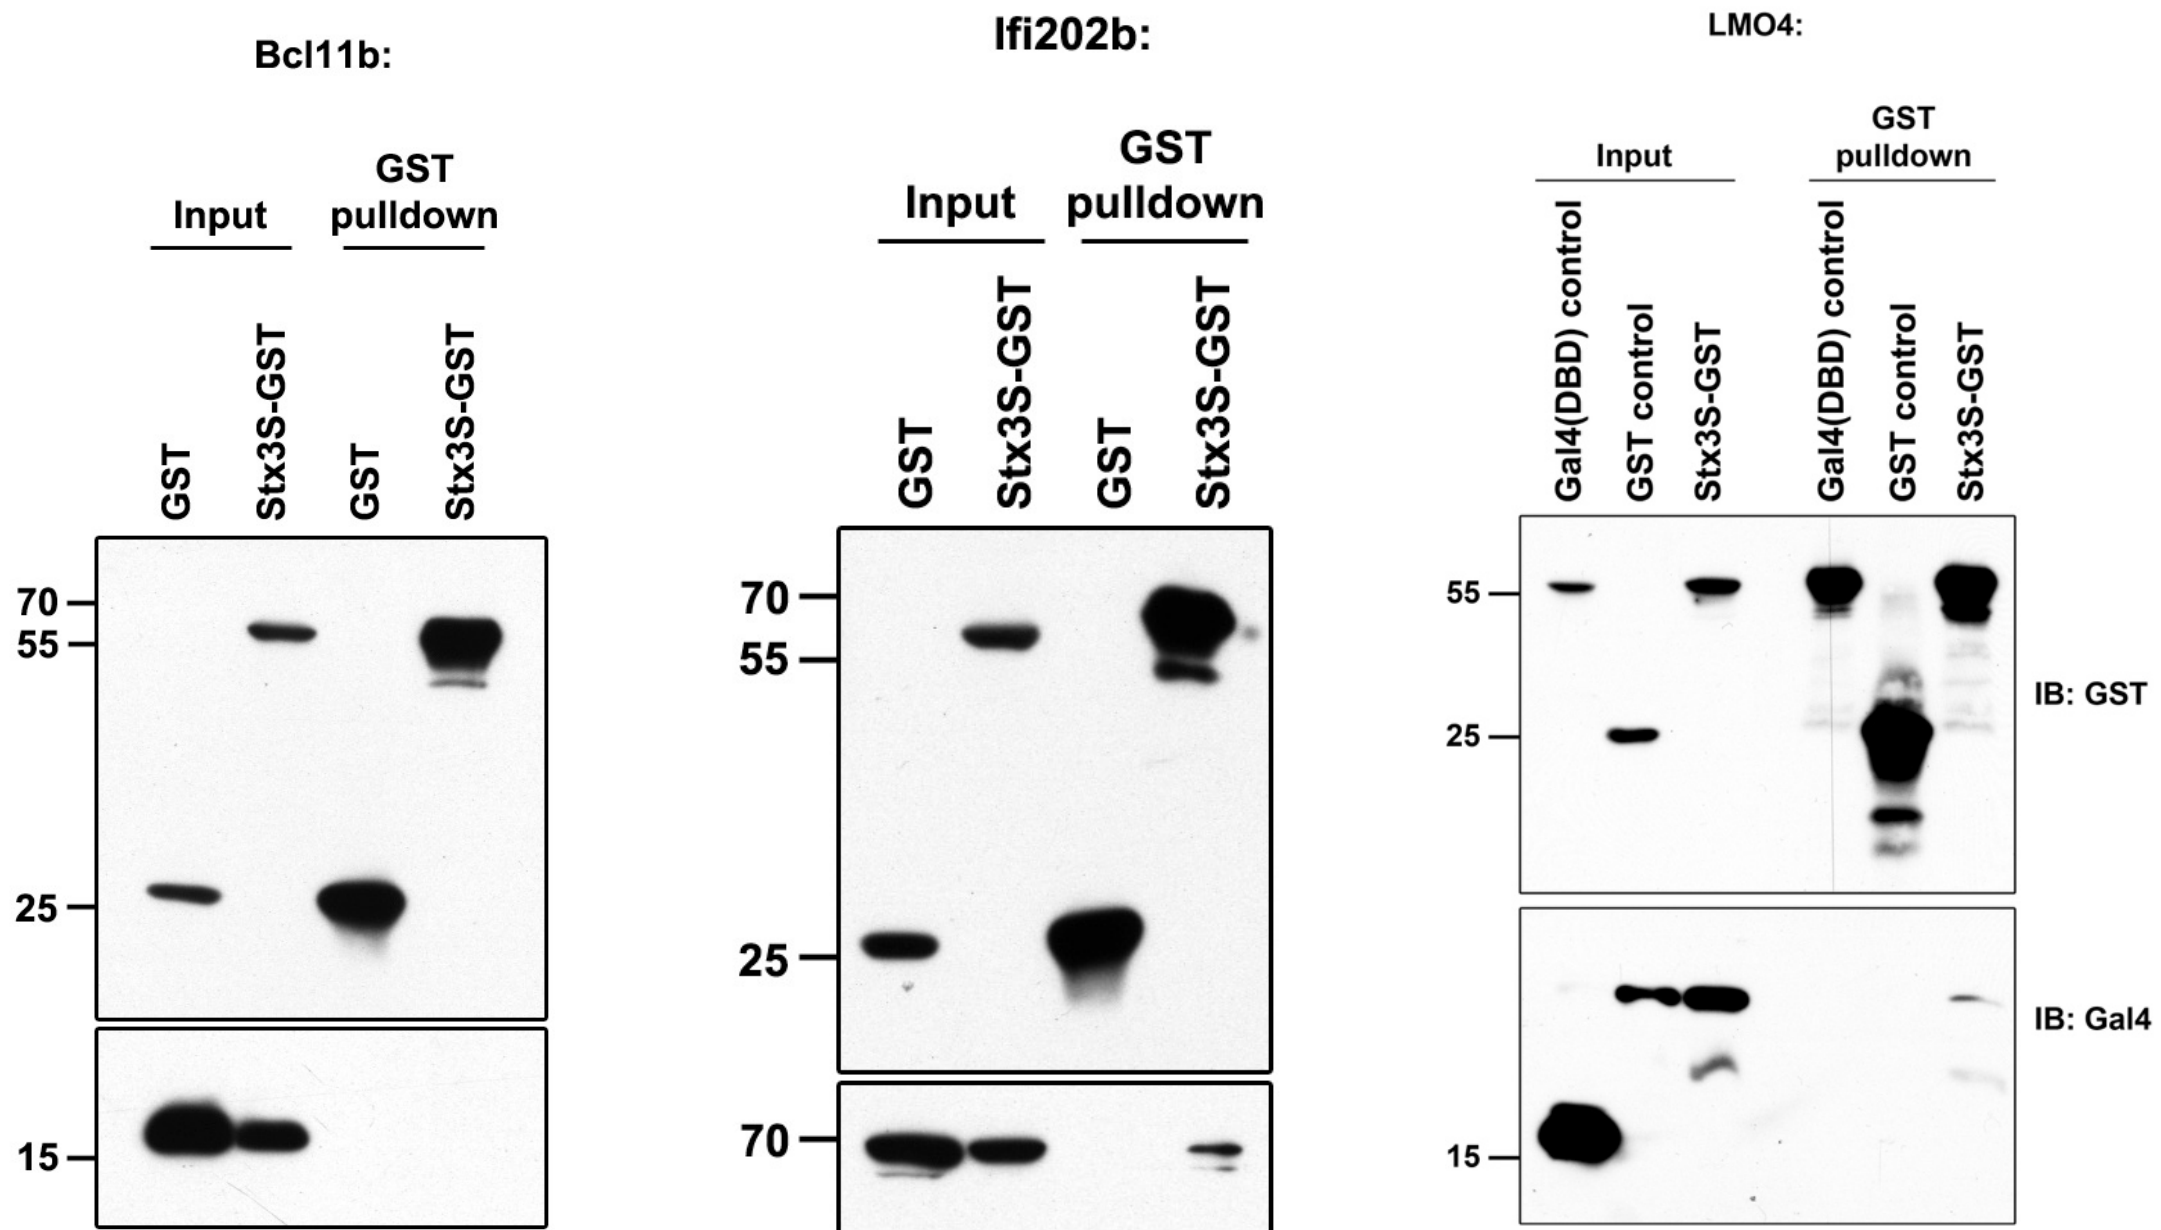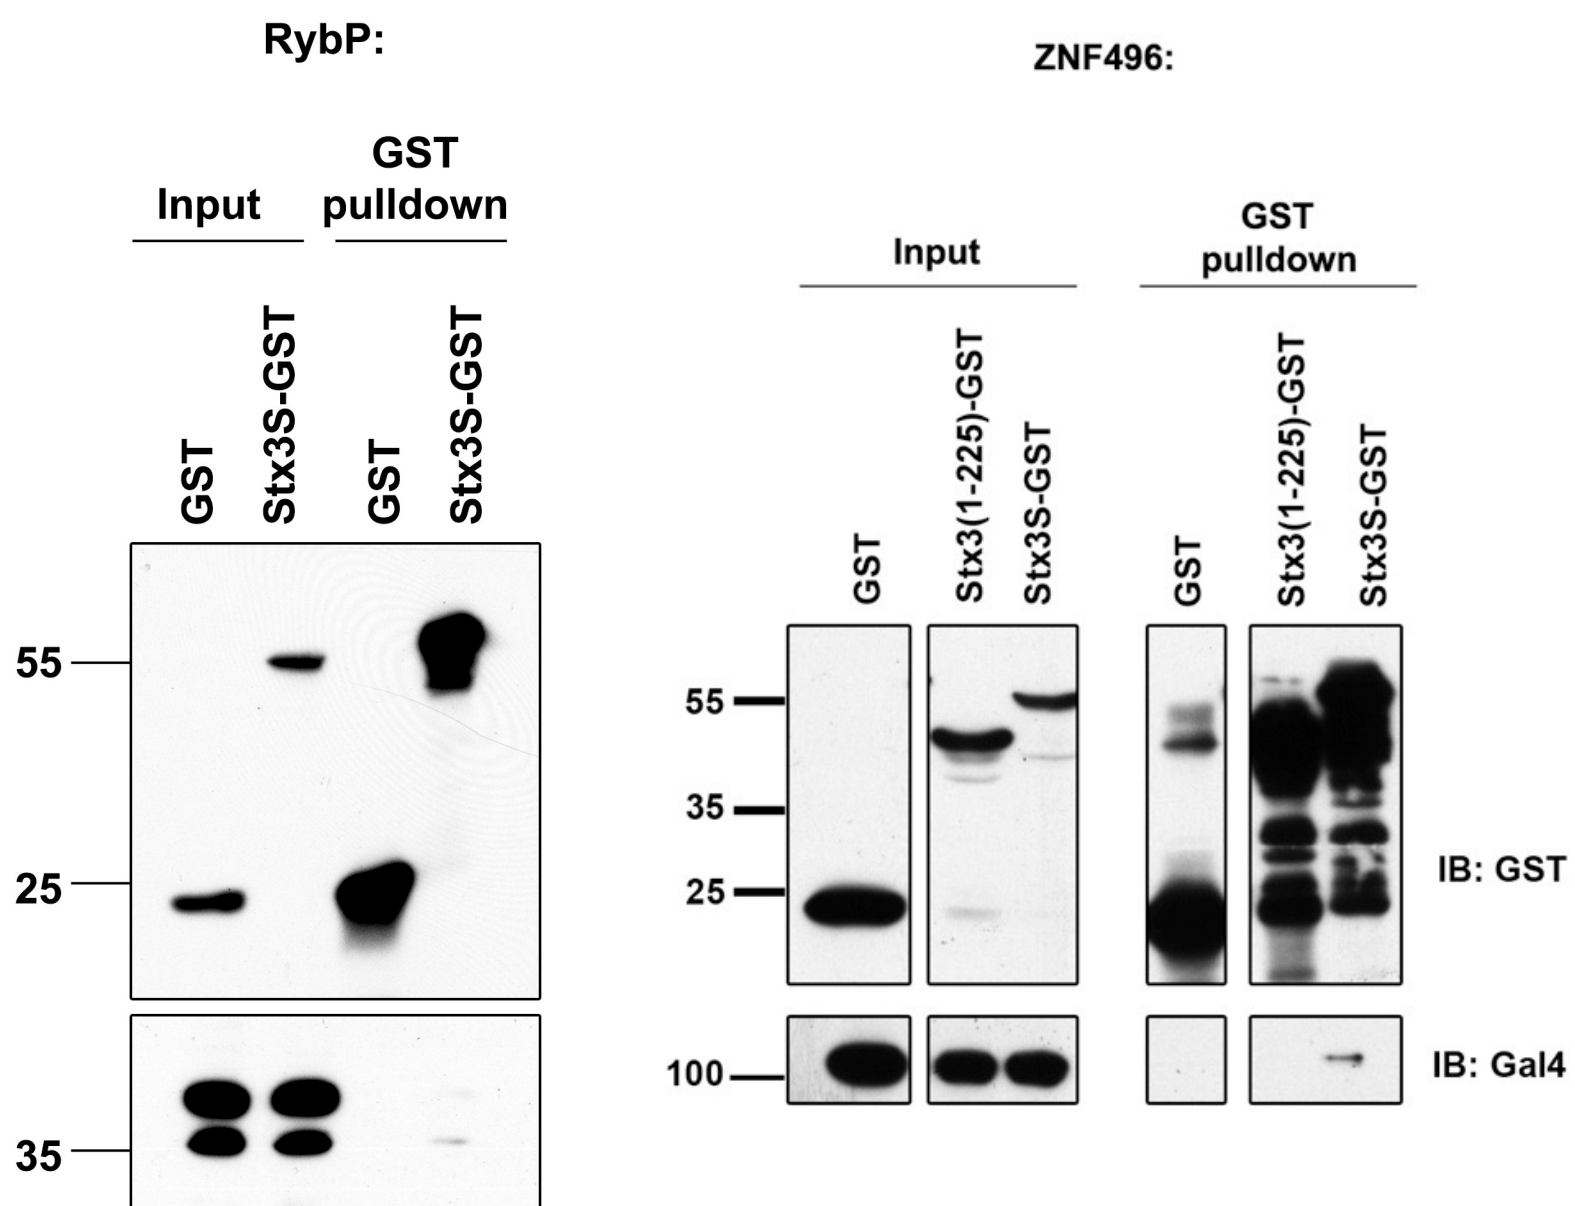

Fig. S2

**A**

|                                                                               |                |                      |                       |
|-------------------------------------------------------------------------------|----------------|----------------------|-----------------------|
|                                                                               | exon 9/exon 11 |                      |                       |
| 757                                                                           | 786            | 787                  | 834                   |
| GCTGTGAAATACCAGAGTCAGGCCCGGAAGAACTGATTTCACTCCAGACTGGTGTGGCCACCCTTGTCTTCAGATGA |                |                      |                       |
|                                                                               | C1             | GCCCGGAAGAACTGATTTCA |                       |
|                                                                               | C2             | CCGGAAGAACTGATTTCACT |                       |
|                                                                               | C3             |                      | GCCACCCTTGTCTTCAGATGA |
|                                                                               | C4             | GGAAGAACTGATTTCACTCC |                       |
|                                                                               | C5             | CAGGCCCGGAAGAACTGATT |                       |

**B**

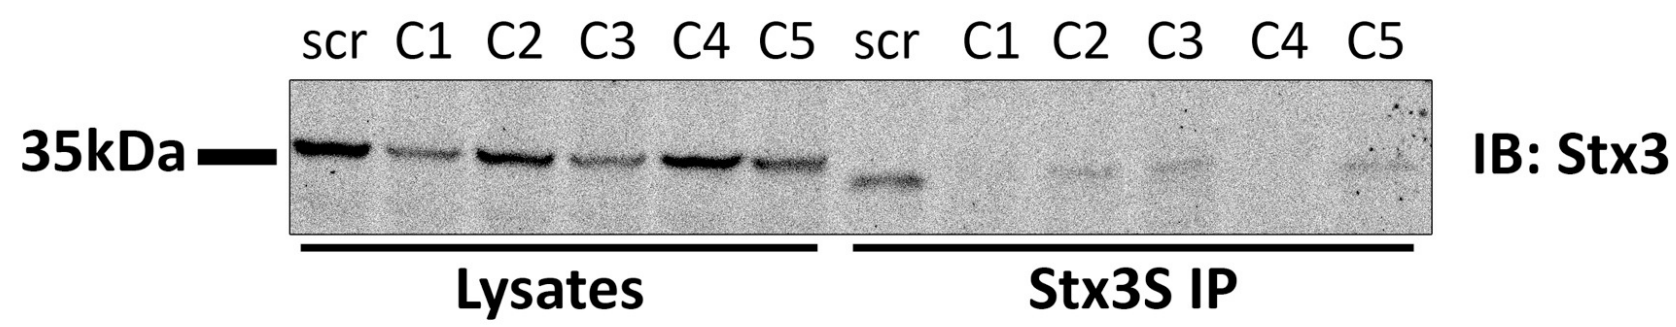

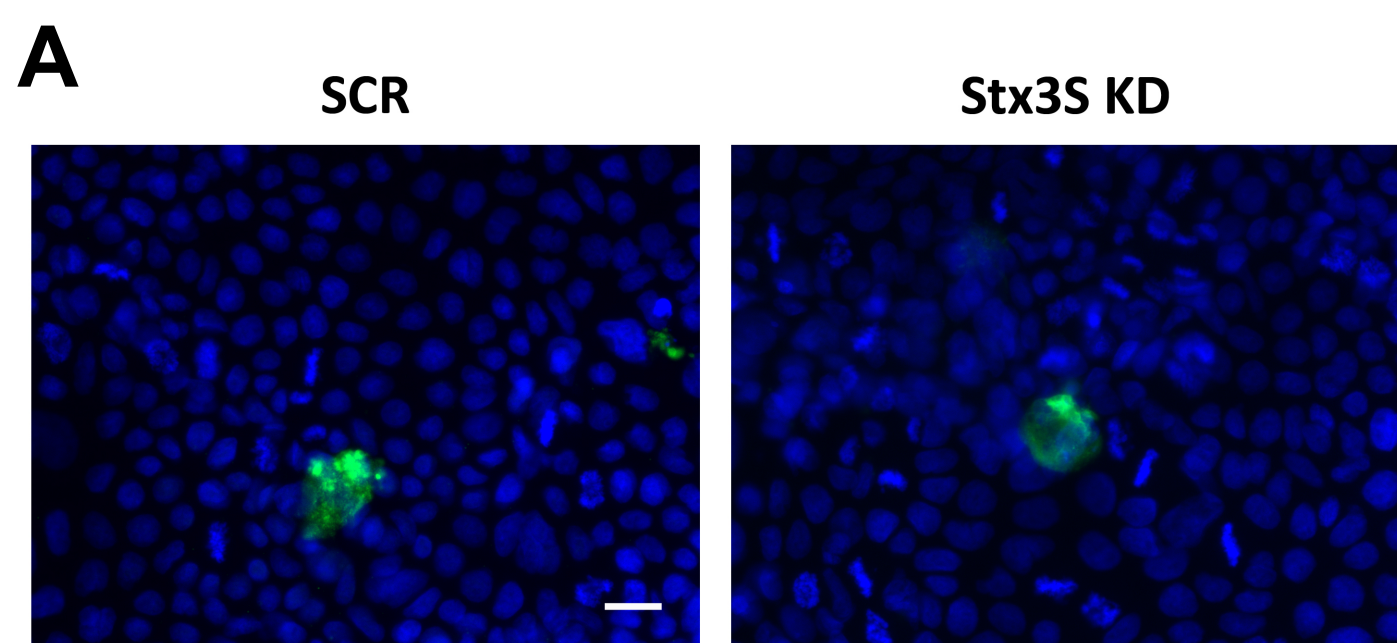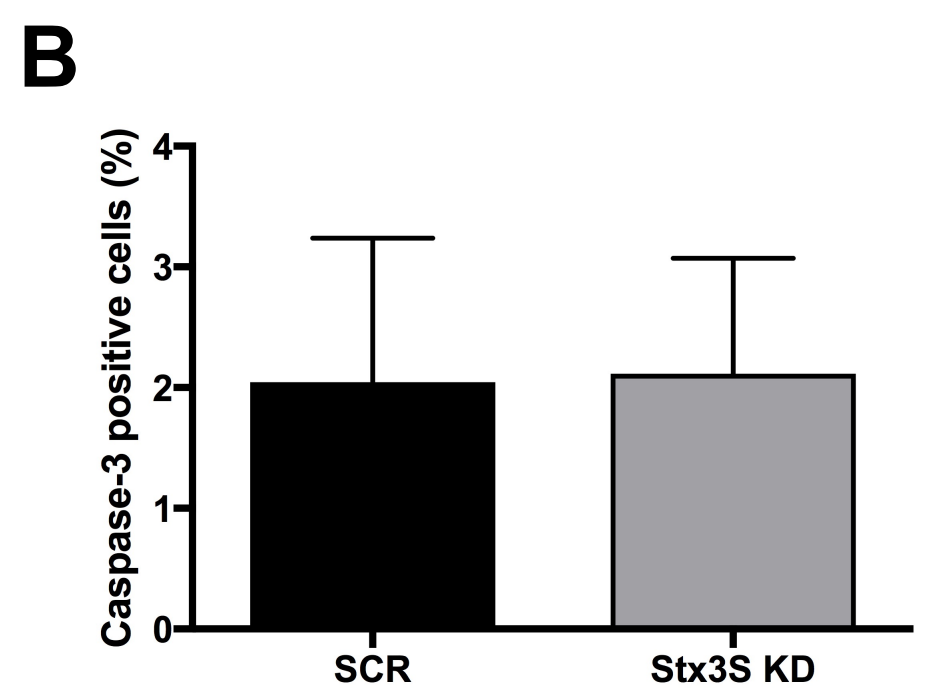

Supplement: supp_RA117.000874_133791_2_supp_79494_p4gtzj.pdf [file supp_RA117.000874_133791_2_supp_79494_p4gtzj.pdf]
